# Supplementary material
Source: publisher figshare collection journal article supplement (https://asha.figshare.com/ndownloader/files/23322512)
Supplement: Supplementary file 1 [file 23322512]

## Supplemental Material S2.

Minimum, maximum, and average speech sample durations in seconds from each of the four speaker groups.

| Group             | Minimum | Maximum | Average |
|-------------------|---------|---------|---------|
| Cisgender Females | 4.34    | 8.53    | 5.85    |
| Cisgender Males   | 4.84    | 7.62    | 6.01    |
| Transfeminine     | 3.27    | 8.08    | 5.98    |
| Transmasculine    | 4.24    | 8.34    | 6.51    |
